# Supplementary material for: Incorporating deep and shallow components of genetic structure into the management of Alaskan red king crab
Source: PubMed Central journal article supplement (PMC3552400; doi:10.1111/j.1752-4571.2012.00260.x), 2012-12

**Supporting tables and figures for Grant and Cheng, Incorporating historical and contemporary components of genetic structure into the management of Alaskan red king crab. *Evolutionary Applications***

**Table S1** Fifteen single nucleotide polymorphic (SNP) primers and markers in red king crab

**Table S2** Allele frequencies for 15 single nucleotide polymorphisms in 17 samples of red king crab from the North Pacific

**Table S3** Values of  $F_{ST}$ , based on frequencies of 15 SNP loci, between samples of North Pacific red king crab

**Table S4** Haplotype frequencies for a 665 bp fragment of cytochrome oxidase subunit 1 in red king crabs from the North Pacific

**Table S5** Values of  $F_{ST}$ , based on mitochondrial DNA haplotype frequencies, between North Pacific red king crab

**Table S6** Values of  $\Phi_{ST}$ , based on mitochondrial DNA frequencies and divergences (Tamura & Nei 1993), between samples of North Pacific red king crab

**Table S7** Summary statistics from mismatch distributions

**Table S8** Comparison of genetic population structure among crustaceans

**Figure S1** MtDNA mismatch distributions in samples from western populations.

**Figure S2** MtDNA mismatch distributions in samples from the SE Bering Sea and western Gulf of Alaska.

**Figure S3** MtDNA mismatch distribution in samples from SE Alaska.

**Table S1.** Fifteen single nucleotide polymorphic (SNP) (An *et al.* 2010) primers and markers in red king crab, polymerase chain reaction (PCR) sequences for forward (F) and reverse (R) primers, and 'VIC' and 'FAM' sequences are optical markers of the SNP. Marker names consist of the species identifier (*Pca* for *Paralithodes camtschaticus*) and arbitrary numbers.  $T_a$  are optimized annealing temperatures.

| Marker name<br>/GenBank accession<br>Number | Oligonucleotide sequences (5'-3') <sup>a</sup>                                                                                    | $T_a$<br>(°C) |
|---------------------------------------------|-----------------------------------------------------------------------------------------------------------------------------------|---------------|
| <i>Pca_U0001</i><br>GU128158                | F: CAACAACAGATGGCGTTCATAATGA<br>R: TCCTATGTAGTAATAATATTGGGACCATAAAAAGGT<br>VIC- CCAAGGGATCTCATTTT<br>FAM- AAGGGATCTAATTTT         | 59            |
| <i>Pca_U0002</i><br>GU128159                | F: TGTCTAAAACAATGCAACTTCAAGCAA<br>R: TGGCAAGCTAAGACAATGTTGGTTA<br>VIC- TCCCCTCAAACTCAA<br>FAM- ATTCCCCTCATACTCAA                  | 60            |
| <i>Pca_U0003</i><br>GU128160                | F: ACAATGTTATGCAGTTTAAGAAAGACCTATGT<br>R: CGTATTCTGGTTACCATCTGACGAT<br>VIC- CAAATGAGTATATAACAATCT<br>FAM- CAAATGAGTAAATACAATCT    | 59            |
| <i>Pca_U0004</i><br>GU128161                | F: GGCTGTGAATGTCCACTCCTATT<br>R: GCCCTTTTTGAGATACAGTACAAAGC<br>VIC- CCATTAGGGAAGAGTCA<br>FAM- CATTAGGGAGGAGTCA                    | 58            |
| <i>Pca_U0005</i><br>GU128162                | F: CAGGGATCGACTTCCGCTTAA<br>R: AGCTCTCTGTAGCGAGTAATCGATA<br>VIC- TCAACGGCGCCAGTT<br>FAM- TCAACGGCACCAGTT                          | 58            |
| <i>Pca_U0006</i><br>GU128163                | F: TGCTTGCCTTCCAGTATGTTTCAT<br>R: CTCCTGTAGGTCATGCCATCATTAT<br>VIC- CCTGCCAAATTTCTTA<br>FAM- CTGCCAAACTTCTTA                      | 60            |
| <i>Pca_U0007</i><br>GU128164                | F: CATCTCTTTTTCCATTGTATACATTGCACAT<br>R: CCGCAGAGTCTCAGAATATTGTTTAGG<br>VIC- ACATTAACTTTTAAGCTTTTCA<br>FAM- CATTAACTTTTAAGGTTTTCA | 60            |
| <i>Pca_U0008</i>                            | F:                                                                                                                                | 60            |

|                              |                                                                                                                              |    |
|------------------------------|------------------------------------------------------------------------------------------------------------------------------|----|
| GU128165                     | CCAACATACTTAAAATTGTAACGATAAGAAAAGAACT<br>R: AGCTTCGGCATGGACGTTAG<br>VIC- ACACTATGATAGAAATAAAA<br>FAM- ACTATGATAGAAAAAAA      |    |
| <i>Pca_U0009</i><br>GU128166 | F: GCTCTACATCATAGTAAGGCCAAGTT<br>R: TTCAACTGAAGGTAAATTGCAATGTTATCATAAAA<br>VIC- CATATTTCACTACAAAAAC<br>FAM- ATTTCACTCCAAAAAC | 60 |
| <i>Pca_U0010</i><br>GU128167 | F: GCATGTGCGTTTTGAGTTTTGTATCT<br>R: CCCGGCACCCTTAGGAT<br>VIC- ATGCAGTTGGTAAAGAA<br>FAM- ATGCAGTTGTTAAAGAA                    | 60 |
| <i>Pca_U0011</i><br>GU128168 | F: ACAGAGCAAGCCAAATGTAATGACA<br>R: TGTTTGACGGTACTGGAACGG<br>VIC- TCGCGCTAATAAGTCATGT<br>FAM- TCGCGCTAATAATTCATGT             | 60 |
| <i>Pca_U0012</i><br>GU128169 | F: GCGTGATAGTGGGAGGGAAATC<br>R: ACAATATTTAAACCTGTTCTTGTCTGCTAGT<br>VIC- AACAGCTGATAAAAAC<br>FAM- ACAGCTGTTAAAAAC             | 60 |
| <i>Pca_U0013</i><br>GU128170 | F: CTTCTCCCGAAACAAGCTAGCTAA<br>R: GGTGGCCATGAATGAAACTCCTT<br>VIC- CATCAGGGTAATTAATTTGA<br>FAM- ATCAGGGTAATTCATTTGA           | 60 |
| <i>Pca_U0014</i><br>GU128171 | F: ATCAGGGTAATTCATTTGA<br>R: CTTATTGGCCAGAGTGGACAGA<br>VIC- CTTATTGGCCAGAGTGGACAGA<br>FAM- CTTATTGGCCAGAGTGGACAGA            | 60 |
| <i>Pca_U0015</i><br>GU128172 | F: ACTGACATGCCTATCGATCTATTGC<br>R: GGCTACTGTACATGGAGATGATTCA<br>VIC- CATGAGGACCAAGACGT<br>FAM- CATGAGGACCCAGACGT             | 60 |

---

<sup>a</sup>Each allele-specific probe was labelled with either VIC or FAM on its 5' end and bore a minor groove binder and a nonfluorescent quencher on its 3' end

#### Reference

An, J.-H., Bechet, A., Berggren, A., Brown, S.-K. *et al.* 2010. Permanent genetic resources added to Molecular Ecology Resources database 1 October 2009-30 November 2009. *Molecular Ecology Resources* **10**:404–408.

**Table S2.** Allele frequencies for 15 single nucleotide polymorphisms in 17 samples of red king crab from the North Pacific

| Location           | U0001 |       |     | U0002 |       |     | U0003 |       |     | U0004 |       |     | U0005 |       |     |
|--------------------|-------|-------|-----|-------|-------|-----|-------|-------|-----|-------|-------|-----|-------|-------|-----|
|                    | G     | T     | 2N  | A     | T     | 2N  | A     | T     | 2N  | C     | T     | 2N  | C     | T     | 2N  |
| 1. Okhostk Sea     | 0.962 | 0.038 | 104 | 0.000 | 1.000 | 104 | 0.638 | 0.362 | 94  | 0.048 | 0.952 | 104 | 0.888 | 0.112 | 98  |
| 2. Norton Sound    | 0.899 | 0.101 | 188 | 0.038 | 0.962 | 182 | 0.586 | 0.414 | 186 | 0.059 | 0.941 | 186 | 0.870 | 0.130 | 184 |
| 3. Adak Island     | 0.768 | 0.232 | 142 | 0.019 | 0.981 | 162 | 0.689 | 0.311 | 164 | 0.024 | 0.976 | 164 | 0.873 | 0.127 | 158 |
| 4. Probilof Island | 0.892 | 0.108 | 186 | 0.016 | 0.984 | 186 | 0.608 | 0.392 | 186 | 0.032 | 0.968 | 186 | 0.853 | 0.147 | 184 |
| 5. Bristol Bay     | 0.878 | 0.122 | 180 | 0.006 | 0.994 | 158 | 0.638 | 0.362 | 130 | 0.006 | 0.994 | 168 | 0.820 | 0.180 | 122 |
| 6. Alitak Bay      | 0.962 | 0.038 | 184 | 0.000 | 1.000 | 188 | 0.506 | 0.494 | 178 | 0.016 | 0.984 | 184 | 0.776 | 0.224 | 174 |
| 7. Chiniak Bay     | 0.958 | 0.042 | 190 | 0.000 | 1.000 | 190 | 0.574 | 0.426 | 188 | 0.021 | 0.979 | 190 | 0.811 | 0.189 | 190 |
| 8. Uganik Bay      | 0.921 | 0.079 | 190 | 0.000 | 1.000 | 144 | 0.560 | 0.440 | 168 | 0.011 | 0.989 | 190 | 0.772 | 0.228 | 184 |
| 9. Kukak Bay       | 0.935 | 0.065 | 124 | 0.000 | 1.000 | 124 | 0.526 | 0.474 | 114 | 0.016 | 0.984 | 124 | 0.730 | 0.270 | 122 |
| 10. Kamishak Bay   | 0.924 | 0.076 | 132 | 0.000 | 1.000 | 128 | 0.524 | 0.476 | 124 | 0.023 | 0.977 | 132 | 0.800 | 0.200 | 130 |
| 11. Kachemak Bay   | 0.940 | 0.060 | 84  | 0.000 | 1.000 | 90  | 0.511 | 0.489 | 88  | 0.033 | 0.967 | 90  | 0.778 | 0.222 | 90  |
| 12. St James Bay   | 1.000 | 0.000 | 184 | 0.000 | 1.000 | 144 | 0.392 | 0.608 | 176 | 0.000 | 1.000 | 188 | 0.761 | 0.239 | 180 |
| 13. Eagle River    | 1.000 | 0.000 | 182 | 0.000 | 1.000 | 188 | 0.297 | 0.703 | 182 | 0.000 | 1.000 | 186 | 0.694 | 0.306 | 186 |
| 14. Barlow Cove    | 1.000 | 0.000 | 188 | 0.000 | 1.000 | 184 | 0.424 | 0.576 | 170 | 0.016 | 0.984 | 182 | 0.741 | 0.259 | 166 |
| 15. Seymour Canal  | 1.000 | 0.000 | 100 | 0.000 | 1.000 | 98  | 0.478 | 0.522 | 90  | 0.010 | 0.990 | 100 | 0.773 | 0.227 | 88  |
| 16. Deadman Reach  | 0.997 | 0.003 | 360 | 0.000 | 1.000 | 382 | 0.394 | 0.606 | 376 | 0.000 | 1.000 | 382 | 0.761 | 0.239 | 380 |
| 16a. 1989          | 1.000 | 0.000 | 168 | 0.000 | 1.000 | 190 | 0.404 | 0.596 | 188 | 0.000 | 1.000 | 190 | 0.753 | 0.247 | 190 |
| 16b. 2001          | 0.995 | 0.005 | 190 | 0.000 | 1.000 | 192 | 0.383 | 0.617 | 188 | 0.000 | 1.000 | 192 | 0.768 | 0.232 | 190 |
| 17. Gambier Bay    | 1.000 | 0.000 | 190 | 0.000 | 1.000 | 190 | 0.414 | 0.586 | 186 | 0.021 | 0.979 | 188 | 0.739 | 0.261 | 188 |

Table S2. Continued

|      | U0006 |       |     | U0007 |       |     | U0008 |       |     | U0009 |       |     | U0010 |       |     |
|------|-------|-------|-----|-------|-------|-----|-------|-------|-----|-------|-------|-----|-------|-------|-----|
|      | A     | G     | 2N  | C     | G     | 2N  | A     | T     | 2N  | A     | C     | 2N  | A     | C     | 2N  |
| 1.   | 0.010 | 0.990 | 102 | 0.990 | 0.010 | 104 | 0.245 | 0.755 | 98  | 0.794 | 0.206 | 102 | 0.231 | 0.769 | 104 |
| 2.   | 0.032 | 0.968 | 154 | 0.984 | 0.016 | 182 | 0.385 | 0.615 | 156 | 0.770 | 0.230 | 178 | 0.247 | 0.753 | 182 |
| 3.   | 0.142 | 0.858 | 162 | 1.000 | 0.000 | 166 | 0.111 | 0.889 | 162 | 0.753 | 0.247 | 162 | 0.256 | 0.744 | 160 |
| 4.   | 0.092 | 0.908 | 184 | 0.984 | 0.016 | 184 | 0.207 | 0.793 | 184 | 0.837 | 0.163 | 184 | 0.185 | 0.815 | 130 |
| 5.   | 0.065 | 0.935 | 186 | 0.982 | 0.018 | 164 | 0.106 | 0.894 | 94  | 0.761 | 0.239 | 134 | 0.145 | 0.855 | 138 |
| 6.   | 0.043 | 0.957 | 188 | 0.956 | 0.044 | 182 | 0.187 | 0.813 | 182 | 0.871 | 0.125 | 184 | 0.118 | 0.882 | 136 |
| 7.   | 0.068 | 0.932 | 190 | 0.978 | 0.022 | 186 | 0.204 | 0.796 | 186 | 0.830 | 0.170 | 182 | 0.134 | 0.866 | 142 |
| 8.   | 0.059 | 0.941 | 186 | 0.984 | 0.016 | 186 | 0.181 | 0.819 | 182 | 0.933 | 0.067 | 180 | 0.170 | 0.830 | 188 |
| 9.   | 0.073 | 0.892 | 130 | 0.968 | 0.032 | 124 | 0.196 | 0.804 | 112 | 0.831 | 0.169 | 118 | 0.217 | 0.783 | 120 |
| 10.  | 0.108 | 0.892 | 130 | 0.977 | 0.023 | 132 | 0.189 | 0.811 | 122 | 0.850 | 0.150 | 80  | 0.175 | 0.825 | 120 |
| 11.  | 0.078 | 0.922 | 90  | 1.000 | 0.000 | 90  | 0.167 | 0.833 | 90  | 0.798 | 0.202 | 84  | 0.179 | 0.821 | 56  |
| 12.  | 0.011 | 0.989 | 186 | 0.933 | 0.067 | 180 | 0.262 | 0.738 | 172 | 0.854 | 0.146 | 164 | 0.076 | 0.924 | 184 |
| 13.  | 0.005 | 0.995 | 186 | 0.947 | 0.053 | 188 | 0.256 | 0.744 | 180 | 0.844 | 0.156 | 180 | 0.078 | 0.922 | 180 |
| 14.  | 0.011 | 0.989 | 190 | 0.962 | 0.038 | 184 | 0.254 | 0.746 | 114 | 0.783 | 0.217 | 166 | 0.086 | 0.914 | 174 |
| 15.  | 0.000 | 1.000 | 100 | 0.948 | 0.052 | 96  | 0.152 | 0.848 | 66  | 0.857 | 0.143 | 84  | 0.065 | 0.935 | 92  |
| 16.  | 0.008 | 0.992 | 382 | 0.953 | 0.047 | 382 | 0.237 | 0.763 | 372 | 0.841 | 0.159 | 328 | 0.106 | 0.894 | 368 |
| 16a. | 0.011 | 0.989 | 190 | 0.942 | 0.058 | 190 | 0.245 | 0.771 | 184 | 0.863 | 0.137 | 168 | 0.120 | 0.880 | 184 |
| 16b. | 0.005 | 0.995 | 192 | 0.964 | 0.036 | 192 | 0.229 | 0.806 | 188 | 0.819 | 0.181 | 160 | 0.092 | 0.908 | 184 |
| 17.  | 0.005 | 0.995 | 190 | 0.932 | 0.068 | 190 | 0.194 | 0.806 | 180 | 0.889 | 0.111 | 180 | 0.079 | 0.921 | 190 |

Table S2. Continued.

|      | U0011 |       |     | U0012 |       |     | U0013 |       |     | U0014 |       |     | U0015 |       |     |
|------|-------|-------|-----|-------|-------|-----|-------|-------|-----|-------|-------|-----|-------|-------|-----|
|      | A     | C     | 2N  | A     | T     | 2N  | G     | T     | 2N  | C     | T     | 2N  | G     | T     | 2N  |
| 1.   | 0.154 | 0.846 | 104 | 0.990 | 0.010 | 104 | 0.596 | 0.404 | 104 | 0.150 | 0.850 | 100 | 0.048 | 0.952 | 104 |
| 2.   | 0.200 | 0.800 | 170 | 0.979 | 0.021 | 188 | 0.521 | 0.479 | 146 | 0.176 | 0.824 | 188 | 0.000 | 1.000 | 184 |
| 3.   | 0.218 | 0.782 | 156 | 1.000 | 0.000 | 164 | 0.443 | 0.557 | 158 | 0.120 | 0.880 | 166 | 0.037 | 0.963 | 164 |
| 4.   | 0.176 | 0.824 | 188 | 0.984 | 0.016 | 186 | 0.415 | 0.585 | 188 | 0.239 | 0.761 | 188 | 0.032 | 0.968 | 188 |
| 5.   | 0.178 | 0.822 | 180 | 0.988 | 0.012 | 166 | 0.456 | 0.544 | 180 | 0.185 | 0.815 | 178 | 0.056 | 0.944 | 180 |
| 6.   | 0.133 | 0.867 | 188 | 0.995 | 0.005 | 184 | 0.489 | 0.511 | 188 | 0.256 | 0.744 | 176 | 0.070 | 0.930 | 186 |
| 7.   | 0.116 | 0.884 | 190 | 0.989 | 0.011 | 190 | 0.405 | 0.595 | 190 | 0.237 | 0.763 | 186 | 0.053 | 0.947 | 190 |
| 8.   | 0.132 | 0.868 | 190 | 0.995 | 0.005 | 186 | 0.394 | 0.606 | 188 | 0.253 | 0.747 | 190 | 0.048 | 0.952 | 186 |
| 9.   | 0.185 | 0.815 | 124 | 0.992 | 0.008 | 124 | 0.426 | 0.574 | 122 | 0.266 | 0.734 | 124 | 0.024 | 0.976 | 124 |
| 10.  | 0.146 | 0.854 | 130 | 1.000 | 0.000 | 132 | 0.518 | 0.482 | 114 | 0.230 | 0.770 | 122 | 0.077 | 0.923 | 130 |
| 11.  | 0.179 | 0.821 | 84  | 1.000 | 0.000 | 90  | 0.432 | 0.568 | 88  | 0.256 | 0.744 | 86  | 0.045 | 0.955 | 88  |
| 12.  | 0.290 | 0.710 | 186 | 0.995 | 0.005 | 186 | 0.290 | 0.710 | 186 | 0.134 | 0.866 | 186 | 0.215 | 0.785 | 186 |
| 13.  | 0.328 | 0.672 | 180 | 1.000 | 0.000 | 190 | 0.303 | 0.697 | 188 | 0.065 | 0.935 | 184 | 0.207 | 0.793 | 188 |
| 14.  | 0.228 | 0.772 | 184 | 1.000 | 0.000 | 182 | 0.271 | 0.729 | 188 | 0.119 | 0.881 | 176 | 0.218 | 0.782 | 188 |
| 15.  | 0.388 | 0.612 | 98  | 1.000 | 0.000 | 98  | 0.380 | 0.620 | 100 | 0.112 | 0.888 | 98  | 0.280 | 0.720 | 100 |
| 16.  | 0.316 | 0.684 | 348 | 1.000 | 0.000 | 378 | 0.305 | 0.695 | 308 | 0.062 | 0.938 | 372 | 0.294 | 0.706 | 364 |
| 16a. | 0.303 | 0.667 | 188 | 1.000 | 0.000 | 190 | 0.337 | 0.663 | 184 | 0.064 | 0.936 | 188 | 0.299 | 0.701 | 184 |
| 16b. | 0.331 | 0.669 | 160 | 1.000 | 0.000 | 188 | 0.258 | 0.742 | 124 | 0.060 | 0.940 | 184 | 0.289 | 0.711 | 180 |
| 17.  | 0.266 | 0.734 | 188 | 1.000 | 0.000 | 188 | 0.279 | 0.721 | 190 | 0.087 | 0.913 | 184 | 0.298 | 0.702 | 188 |



| Location |   |   |   |   |   |   |   |   |   |    |    |    |    |    |    |     |     |    |
|----------|---|---|---|---|---|---|---|---|---|----|----|----|----|----|----|-----|-----|----|
| Hap      | 1 | 2 | 3 | 4 | 5 | 6 | 7 | 8 | 9 | 10 | 11 | 12 | 13 | 14 | 15 | 16a | 16b | 17 |
| 03       | 1 |   |   |   |   |   |   |   |   |    |    |    |    |    |    |     |     |    |
| 04       | 1 |   |   |   |   |   |   |   |   |    |    |    |    |    |    |     |     |    |
| 05       | 1 |   |   |   |   |   |   |   |   |    |    |    |    |    |    |     |     |    |
| 06       | 1 |   |   |   |   |   |   |   |   |    |    |    |    |    |    |     |     |    |
| 07       | 1 |   |   |   |   |   |   |   |   |    |    |    |    |    |    |     |     |    |
| 08       | 1 |   |   |   |   |   |   |   |   |    |    |    |    |    |    |     |     |    |
| 61       | 1 |   |   |   |   |   |   |   |   |    |    |    |    |    |    |     |     |    |
| 74       |   | 1 |   |   |   |   |   |   |   |    |    |    |    |    |    |     |     |    |
| 09       |   | 1 |   |   |   |   |   |   |   |    |    |    |    |    |    |     |     |    |
| 10       |   | 1 |   |   |   |   |   |   |   |    |    |    |    |    |    |     |     |    |
| 11       |   | 1 |   |   |   |   |   |   |   |    |    |    |    |    |    |     |     |    |
| 12       |   | 1 |   |   |   |   |   |   |   |    |    |    |    |    |    |     |     |    |
| 13       |   | 1 |   |   |   |   |   |   |   |    |    |    |    |    |    |     |     |    |
| 14       |   | 1 |   |   |   |   |   |   |   |    |    |    |    |    |    |     |     |    |
| 15       |   | 1 |   |   |   |   |   |   |   |    |    |    |    |    |    |     |     |    |
| 16       |   | 1 |   |   |   |   |   |   |   |    |    |    |    |    |    |     |     |    |
| 17       |   |   | 1 |   |   |   |   |   |   |    |    |    |    |    |    |     |     |    |
| 18       |   |   | 1 |   |   |   |   |   |   |    |    |    |    |    |    |     |     |    |
| 19       |   |   | 1 |   |   |   |   |   |   |    |    |    |    |    |    |     |     |    |
| 20       |   |   | 1 |   |   |   |   |   |   |    |    |    |    |    |    |     |     |    |
| 21       |   |   |   |   | 1 |   |   |   |   |    |    |    |    |    |    |     |     |    |
| 22       |   |   |   |   | 1 |   |   |   |   |    |    |    |    |    |    |     |     |    |
| 23       |   |   |   |   | 1 |   |   |   |   |    |    |    |    |    |    |     |     |    |
| 24       |   |   |   |   |   | 1 |   |   |   |    |    |    |    |    |    |     |     |    |
| 25       |   |   |   |   |   | 1 |   |   |   |    |    |    |    |    |    |     |     |    |
| 26       |   |   |   |   |   |   | 1 |   |   |    |    |    |    |    |    |     |     |    |
| 27       |   |   |   |   |   |   |   | 1 |   |    |    |    |    |    |    |     |     |    |
| 28       |   |   |   |   |   |   |   | 1 |   |    |    |    |    |    |    |     |     |    |
| 29       |   |   |   |   |   |   |   |   |   | 1  |    |    |    |    |    |     |     |    |
| 30       |   |   |   |   |   |   |   |   |   | 1  |    |    |    |    |    |     |     |    |
| 31       |   |   |   |   |   |   |   |   |   |    | 1  |    |    |    |    |     |     |    |
| 32       |   |   |   |   |   |   |   |   |   |    |    | 1  |    |    |    |     |     |    |
| 33       |   |   |   |   |   |   |   |   |   |    |    | 1  |    |    |    |     |     |    |
| 34       |   |   |   |   |   |   |   |   |   |    |    |    | 1  |    |    |     |     |    |
| 35       |   |   |   |   |   |   |   |   |   |    |    |    |    | 1  |    |     |     |    |
| 36       |   |   |   |   |   |   |   |   |   |    |    |    |    | 1  |    |     |     |    |
| 37       |   |   |   |   |   |   |   |   |   |    |    |    |    | 1  |    |     |     |    |





Table S3 Values of  $F_{ST}$ , based on frequencies of 15 SNP loci, between samples of North Pacific red king crab. Sample numbers as in Table 1.

|    |        |        |        |         |        |         |         |         |         |         |        |         |        |        |        |         |  |
|----|--------|--------|--------|---------|--------|---------|---------|---------|---------|---------|--------|---------|--------|--------|--------|---------|--|
| 2  | 0.0030 |        |        |         |        |         |         |         |         |         |        |         |        |        |        |         |  |
| 3  | 0.0232 | 0.0283 |        |         |        |         |         |         |         |         |        |         |        |        |        |         |  |
| 4  | 0.0110 | 0.0113 | 0.0123 |         |        |         |         |         |         |         |        |         |        |        |        |         |  |
| 5  | 0.0112 | 0.0183 | 0.0063 | 0.0009  |        |         |         |         |         |         |        |         |        |        |        |         |  |
| 6  | 0.0167 | 0.0251 | 0.0409 | 0.0067  | 0.0106 |         |         |         |         |         |        |         |        |        |        |         |  |
| 7  | 0.0154 | 0.0192 | 0.0277 | -0.0009 | 0.0043 | 0.0004  |         |         |         |         |        |         |        |        |        |         |  |
| 8  | 0.0253 | 0.0283 | 0.0328 | 0.0020  | 0.0106 | 0.0011  | -0.0003 |         |         |         |        |         |        |        |        |         |  |
| 9  | 0.0180 | 0.0166 | 0.0261 | 0.0010  | 0.0065 | 0.0004  | 0.0003  | -0.0007 |         |         |        |         |        |        |        |         |  |
| 10 | 0.0073 | 0.0149 | 0.0226 | 0.0007  | 0.0036 | -0.0032 | -0.0001 | 0.0011  | -0.0018 |         |        |         |        |        |        |         |  |
| 11 | 0.0149 | 0.0168 | 0.0216 | -0.0016 | 0.0013 | -0.0024 | -0.0032 | -0.0004 | -0.0074 | -0.0051 |        |         |        |        |        |         |  |
| 12 | 0.0677 | 0.0584 | 0.0788 | 0.0434  | 0.0495 | 0.0336  | 0.0355  | 0.0373  | 0.0337  | 0.0390  | 0.0299 |         |        |        |        |         |  |
| 13 | 0.0912 | 0.0795 | 0.1019 | 0.0691  | 0.0719 | 0.0529  | 0.0601  | 0.0598  | 0.0510  | 0.0587  | 0.0486 | 0.0008  |        |        |        |         |  |
| 14 | 0.0636 | 0.0548 | 0.0718 | 0.0407  | 0.0427 | 0.0333  | 0.0302  | 0.0364  | 0.0312  | 0.0369  | 0.0257 | -0.0023 | 0.0057 |        |        |         |  |
| 15 | 0.0639 | 0.0650 | 0.0694 | 0.0483  | 0.0456 | 0.0406  | 0.0461  | 0.0478  | 0.0422  | 0.0423  | 0.0360 | 0.0044  | 0.0123 | 0.0103 |        |         |  |
| 16 | 0.0756 | 0.0729 | 0.0856 | 0.0597  | 0.0625 | 0.0494  | 0.0521  | 0.0543  | 0.0506  | 0.0521  | 0.0450 | 0.0004  | 0.0031 | 0.0032 | 0.0021 |         |  |
| 17 | 0.0807 | 0.0785 | 0.0866 | 0.0562  | 0.0598 | 0.0441  | 0.0467  | 0.0462  | 0.0473  | 0.0493  | 0.0427 | -0.0001 | 0.0058 | 0.0019 | 0.0031 | -0.0009 |  |
|    | 1      | 2      | 3      | 4       | 5      | 6       | 7       | 8       | 9       | 10      | 11     | 12      | 13     | 14     | 15     | 16      |  |

Tests of each value for significance from 0.0 are routinely made, but this procedure violates the simple requirement of independence when multiple tests are made of the same samples (e.g. 1x2, 1x3, 1x4 . . . 1xn). Often too, the probabilities of the tests are modified to account for the increase in type I error with repeated tests of the same hypothesis. However, these procedures may not adequately control for false positives or may produce false negatives for some comparisons. Finally, and most importantly, the hypotheses being tested changes across the table. The hypothesis for samples from adjacent locations might be whether the samples were drawn from the same randomly mating population. This is a biologically meaningful hypothesis. However it is better tested with hierarchical AMOVAs in a framework that encourages orthogonal comparisons. Hypotheses of tests between samples drawn from geographically distant populations are more difficult to frame. These hypotheses must also include migration or historical isolation to be biologically realistic. While tests of pairwise comparisons may show statistical significance, it is not always possible to assign biological significance to the results of these tests. Hence, tests of significance for the pairwise divergences are not included in the following three tables.

**Table S5.** Values of  $F_{ST}$ , based on mitochondrial DNA haplotype frequencies, between North Pacific red king crab. Sample numbers as in Table 1.

|    |        |        |        |        |        |         |         |         |         |         |        |         |        |         |        |         |  |
|----|--------|--------|--------|--------|--------|---------|---------|---------|---------|---------|--------|---------|--------|---------|--------|---------|--|
| 2  | 0.0332 |        |        |        |        |         |         |         |         |         |        |         |        |         |        |         |  |
| 3  | 0.0057 | 0.0576 |        |        |        |         |         |         |         |         |        |         |        |         |        |         |  |
| 4  | 0.1144 | 0.1278 | 0.1325 |        |        |         |         |         |         |         |        |         |        |         |        |         |  |
| 5  | 0.0936 | 0.1119 | 0.0958 | 0.0018 |        |         |         |         |         |         |        |         |        |         |        |         |  |
| 6  | 0.1930 | 0.1866 | 0.2052 | 0.0046 | 0.0187 |         |         |         |         |         |        |         |        |         |        |         |  |
| 7  | 0.2287 | 0.2192 | 0.2447 | 0.0164 | 0.0438 | -0.0051 |         |         |         |         |        |         |        |         |        |         |  |
| 8  | 0.2084 | 0.2012 | 0.2140 | 0.0147 | 0.0275 | -0.0031 | 0.0048  |         |         |         |        |         |        |         |        |         |  |
| 9  | 0.1946 | 0.1854 | 0.1983 | 0.0077 | 0.0134 | -0.0095 | 0.0002  | -0.0077 |         |         |        |         |        |         |        |         |  |
| 10 | 0.1175 | 0.1227 | 0.1499 | 0.0075 | 0.0045 | 0.0007  | 0.0052  | 0.0182  | 0.0107  |         |        |         |        |         |        |         |  |
| 11 | 0.1608 | 0.1633 | 0.1779 | 0.0030 | 0.0179 | -0.0076 | -0.0029 | -0.0098 | -0.0067 | -0.0023 |        |         |        |         |        |         |  |
| 12 | 0.4673 | 0.4044 | 0.4373 | 0.1616 | 0.2098 | 0.0956  | 0.0938  | 0.0844  | 0.0931  | 0.2206  | 0.1394 |         |        |         |        |         |  |
| 13 | 0.5008 | 0.4257 | 0.4658 | 0.1977 | 0.2618 | 0.1325  | 0.1303  | 0.1207  | 0.1410  | 0.2845  | 0.1910 | 0.0028  |        |         |        |         |  |
| 14 | 0.4285 | 0.3712 | 0.4059 | 0.1433 | 0.1851 | 0.0827  | 0.0809  | 0.0725  | 0.0792  | 0.1924  | 0.1198 | 0.7478  | 0.0040 |         |        |         |  |
| 15 | 0.3781 | 0.3477 | 0.3883 | 0.4386 | 0.4538 | 0.5045  | 0.5409  | 0.5178  | 0.5291  | 0.4898  | 0.5196 | -0.0057 | 0.8031 | 0.7343  |        |         |  |
| 16 | 0.4847 | 0.4274 | 0.4600 | 0.1658 | 0.2129 | 0.0928  | 0.0889  | 0.0807  | 0.0882  | 0.2097  | 0.1310 | 0.0028  | 0.0110 | -0.0034 | 0.7210 |         |  |
| 17 | 0.4124 | 0.3575 | 0.3947 | 0.1323 | 0.1721 | 0.0730  | 0.0703  | 0.0630  | 0.0694  | 0.1711  | 0.1043 | 0.7478  | 0.0075 | -0.0087 | 0.7116 | -0.0042 |  |
|    | 1      | 2      | 3      | 4      | 5      | 6       | 7       | 8       | 9       | 10      | 11     | 12      | 13     | 14      | 15     | 16      |  |

**Table S6.** Values of  $\Phi_{ST}$ , based on mitochondrial DNA frequencies and divergences (Tamura & Nei 1993), between samples of North Pacific red king crab. Sample numbers as in Table 1

|    |        |        |        |         |         |         |         |         |         |         |        |         |         |         |        |        |
|----|--------|--------|--------|---------|---------|---------|---------|---------|---------|---------|--------|---------|---------|---------|--------|--------|
| 2  | 0.0341 |        |        |         |         |         |         |         |         |         |        |         |         |         |        |        |
| 3  | 0.0012 | 0.0402 |        |         |         |         |         |         |         |         |        |         |         |         |        |        |
| 4  | 0.1040 | 0.2047 | 0.0839 |         |         |         |         |         |         |         |        |         |         |         |        |        |
| 5  | 0.1253 | 0.2222 | 0.0933 | -0.0045 |         |         |         |         |         |         |        |         |         |         |        |        |
| 6  | 0.1568 | 0.2543 | 0.1236 | -0.0016 | -0.0089 |         |         |         |         |         |        |         |         |         |        |        |
| 7  | 0.1869 | 0.2903 | 0.1593 | 0.0047  | 0.0053  | -0.0026 |         |         |         |         |        |         |         |         |        |        |
| 8  | 0.1583 | 0.2475 | 0.1156 | 0.0038  | -0.0030 | -0.0044 | 0.0095  |         |         |         |        |         |         |         |        |        |
| 9  | 0.1674 | 0.2579 | 0.1266 | 0.0014  | -0.0094 | -0.0110 | -0.0006 | -0.0108 |         |         |        |         |         |         |        |        |
| 10 | 0.0549 | 0.1457 | 0.0486 | -0.0109 | -0.0024 | 0.0036  | 0.0186  | 0.0152  | 0.0148  |         |        |         |         |         |        |        |
| 11 | 0.1000 | 0.1912 | 0.0716 | -0.0093 | -0.0047 | -0.0037 | 0.0109  | -0.0105 | -0.0062 | -0.0052 |        |         |         |         |        |        |
| 12 | 0.5291 | 0.5434 | 0.4202 | 0.1985  | 0.2430  | 0.1633  | 0.1505  | 0.1610  | 0.1782  | 0.3872  | 0.2664 |         |         |         |        |        |
| 13 | 0.4924 | 0.5115 | 0.3924 | 0.1862  | 0.2290  | 0.1543  | 0.1426  | 0.1513  | 0.1683  | 0.3591  | 0.2448 | -0.0003 |         |         |        |        |
| 14 | 0.4633 | 0.4927 | 0.3696 | 0.1655  | 0.1926  | 0.1322  | 0.1207  | 0.1302  | 0.1379  | 0.3141  | 0.2115 | 0.0034  | 0.0100  |         |        |        |
| 15 | 0.4228 | 0.4335 | 0.3467 | 0.2683  | 0.3243  | 0.2745  | 0.3103  | 0.2577  | 0.3056  | 0.3657  | 0.3053 | 0.7848  | 0.8334  | 0.7398  |        |        |
| 16 | 0.6265 | 0.6290 | 0.5091 | 0.2604  | 0.3192  | 0.2162  | 0.2019  | 0.2143  | 0.2394  | 0.4822  | 0.3510 | -0.0002 | -0.0001 | 0.0072  | 0.7691 |        |
| 17 | 0.4837 | 0.5075 | 0.3869 | 0.1795  | 0.2155  | 0.1468  | 0.1338  | 0.1448  | 0.1574  | 0.3405  | 0.2327 | -0.0020 | -0.0070 | -0.0002 | 0.7664 | 0.0002 |
|    | 1      | 2      | 3      | 4       | 5       | 6       | 7       | 8       | 9       | 10      | 11     | 12      | 13      | 14      | 15     | 16     |

## Reference

Tamura, K., and M. Nei. 1993. Estimation of the number of nucleotide substitutions in the control region of mitochondrial DNA in humans and chimpanzees. *Molecular Biology and Evolution* **10**: 512–526.

**Table S7.** Comparison of genetic population structure among crustaceans

| Species                                                | km           | S        | n           | h                                                  | Mitochondrial DNA          |                            |                   | Microsatellites |                         |             | Comment                                                                                                                                                                                                                                                                         | Ref. <sup>d</sup> |
|--------------------------------------------------------|--------------|----------|-------------|----------------------------------------------------|----------------------------|----------------------------|-------------------|-----------------|-------------------------|-------------|---------------------------------------------------------------------------------------------------------------------------------------------------------------------------------------------------------------------------------------------------------------------------------|-------------------|
|                                                        |              |          |             |                                                    | $\Theta_{\pi}$             | $F_{ST}$                   | $F_{SC}$          | No.             | $F_{ST}$                | $F_{SC}$    |                                                                                                                                                                                                                                                                                 |                   |
| Red king crab<br>( <i>Paralithodes camtschaticus</i> ) | 4100         | 17       | 1278        | 0.911<br>0.662<br>0.236                            | 0.0085<br>0.0031<br>0.0004 | 0.139                      | 0.124             | 15 <sup>c</sup> | 0.054                   | 0.005       | Strong diversity gradient across North Pacific. Large amount of divergence among regional groups.                                                                                                                                                                               | 1                 |
| Spiny spider crab<br>( <i>Maja brachydactyla</i> )     | 3000         | 15       | 299         | 0.819                                              | 0.0038                     | 0.038                      | –                 | 9               | 0.009                   | –           | Occurs in shallow water (0–100m), No large-scale differentiation, but local isolation                                                                                                                                                                                           | 2                 |
| Green crab<br>( <i>Carcinus maenas</i> )               | 4200<br>3300 | 18<br>14 | 1482<br>217 | –<br>0.855<br>0.280                                | –<br>0.0047<br>0.0016      | –<br>0.170                 | –<br>0.030        | 10<br>–         | 0.001 <sup>c</sup><br>– | 0.0001<br>– | 3 groups, no isolation by distance (IBD)<br>Strong divergence between island and continental populations. Little divergence among continental populations. Drop in island diversity. No IBD.                                                                                    | 3<br>4            |
| American lobster<br>( <i>Homarus americanus</i> )      | 1860         | 35       | 2555        | –                                                  | –                          | –                          | –                 | 13              | 0.006 <sup>c</sup>      | –           | North-south groups. Ice-age isolation and bifurcating currents.                                                                                                                                                                                                                 | 5                 |
| European lobster<br>( <i>Homarus gammarus</i> )        | 7100         | 44       | 3283        | 0.517<br>0.912<br>0.610<br>0.907<br>0.846<br>0.551 | –                          | 0.111                      | 0.007             | –               | –                       | –           | 5 groups. No differentiation among 24 central Atlantic populations. Diversity drops in marginal northern and in central Mediterranean populations: six groups: N Norway, S Norway-Sweden-Germany, Netherlands, Scotland–Morocco, W Mediterranean, Aegean (see <i>h</i> column). | 6                 |
| Norway lobster<br>( <i>Nephrops norvegicus</i> )       | 5600         | 12       | 379         | 0.933                                              | 0.0057                     | 0.016 <sup>b</sup>         | 0.005             | –               | –                       | –           | 4 groups. No IBD nor Atlantic Mediterranean divide. Recent expansion. No Mediterranean glacial refuge.                                                                                                                                                                          | 7                 |
| Spiny lobster<br>( <i>Palinurus gilchristi</i> )       | 1100         | 4        | 187         | 0.858                                              | 0.0042                     | 0.000                      | –                 | –               | –                       | –           | Panmixia. Long larval pelagic stage and dispersal in Aghulas Current. Post-glacial expansion over submerged Aghulas Bank..                                                                                                                                                      | 8                 |
| Japanese mitten crab<br>( <i>Eriocheir japonica</i> )  | 4200         | 19       | 666         | 0.711<br>0.341<br>0.121                            | 0.030<br>0.011<br>0.001    | 0.66–<br>0.92 <sup>c</sup> | 0.10 <sup>c</sup> | –               | –                       | –           | 3 major groups corresponding to island groups (42.3% of total variation), but less among populations within groups (1.8%).                                                                                                                                                      | 9                 |

|                                                     |      |    |     |                                           |                                           |                   |         |   |         |        |                                                                                                                                                                                                                                                                   |    |
|-----------------------------------------------------|------|----|-----|-------------------------------------------|-------------------------------------------|-------------------|---------|---|---------|--------|-------------------------------------------------------------------------------------------------------------------------------------------------------------------------------------------------------------------------------------------------------------------|----|
|                                                     |      |    |     |                                           |                                           |                   |         |   |         |        | Some isolation between populations in Japan's rivers and estuaries. Strong isolation between islands.                                                                                                                                                             |    |
| Blue crab<br>( <i>Callinectes<br/>sapidus</i> )     | 4600 | 14 | 176 | 0.670<br>0.948<br>0.850<br>0.941<br>0.830 | 0.010<br>0.022<br>0.017<br>0.020<br>0.021 | 0.04 <sup>b</sup> | –       | – | –       | –      | Estuarine and coastal habitats. Significant differentiation among populations, but no geographic pattern. Lower diversities in north, and possible in ecological marginal population is Keys and Mexico. Deep mtDNA genealogy, but signature of recent expansion. | 10 |
| Antarctic krill<br>( <i>Euphausia<br/>superba</i> ) | 7500 | 12 | 641 | 0.856                                     | 0.0014                                    | -0.0009           | -0.0018 | 2 | -0.0008 | 0.0034 | Panmixia. Mobile pelagic adults and larvae lead to high levels of gene flow.                                                                                                                                                                                      | 11 |

Significance: <sup>a</sup>  $P < 0.05$ , <sup>b</sup>  $P < 0.01$ , <sup>c</sup>  $P < 0.001$ .

<sup>d</sup>References: 1. This study; 2. Sotelo et al. (2008); 3. Domingues et al. (2010); 4. Roman and Palumbi (2004); 5. Kenchington et al. (2009); 6. Triantafyllidis et al. (2005); 7. Stamatis et al. (2004); 8. Tolley et al. (2005); 9. Yamasaki et al. (2006); 10. McMillen-Jackson and Bert (2004); 11. Bortolotto et al. (2011).

<sup>e</sup>SNP loci.

## References

- Bortolotto, E., A. Bucklin, M. Mezzavilla, L. Zane, and T. Paternello. 2011. Gone with the currents: lack of genetics differentiation at the circum-continental scale in the Antarctic krill *Euphausia superba*. *BMC Genetics* **12**:32.
- Domingues, C. P., S. Creer, M. I. Taylor, H. Queiroga, and G. R. Carvalho. 2010. Genetic structure of *Carcinus maenas* within its native range: larval dispersal and oceanographic variability. *Marine Ecology Progress Series* **410**:111–123.
- Kenchington, E. L., G. C. Harding, M. W. Jones, and P. A. Prodöhl. 2009. Pleistocene glaciations events shape genetic structure across the range of the American lobster, *Homarus americanus*. *Molecular Ecology* **18**:1654–1667.
- McMillen-Jackson, A. L., and T. M. Bert. 2004. Mitochondrial DNA variation and population genetic structure of the blue crab *Callinectes sapidus* in the eastern United States. *Marine Biology* **145**:769–777.
- Roman, J., and S. R. Palumbi. 2004. A global invader at home: population structure of the green crab, *Carcinus maenas*, in Europe. *Molecular Ecology* **13**:2891–2898.
- Triantafyllidis, A. P., A. Apostolidis, V. Katsares, E. Kelly, J. Mercer, M. Hughes, K. E. Jørstad, A. Tsolou, R. Hynes, and C. Triantaphyllidis. 2005. Mitochondrial DNA variation in the European lobster (*Homarus gammarus*) throughout the range. *Marine Biology* **146**:223–235.

- Sotelo, G., P. Morán, L. Fernández, and D. Posada. 2008. Genetic variation of the spine spider crab *Maja brachydactyla* in the northeastern Atlantic. *Marine Ecology Progress Series* **362**:211–223.
- Stamatis, C., A. Triantafyllidis, K. A. Moutou, and Z. Mamuris. 2004. Mitochondrial DNA variation in Northeast Atlantic and Mediterranean populations of Norway lobster, *Neprops norvegicus*. *Molecular Ecology* **13**:1377–1390.
- Tolley, K. A., J. C. Groeneveld, K. Gopal, and C. A. Mathee. 2005. Mitochondrial DNA panmixia in spiny lobster *Palinurus gilchristi* suggests a population expansion. *Marine Ecology Progress Series* **297**:225–231.
- Yamasaki, I., G. Yoshizaki, M. Yokoto, C. A. Strüssmann, and S. Watanabe. 2006. Mitochondrial DNA variation and population structure of the Japanese mitten crab *Eriocheir japonica*. *Fisheries Science* **72**:299–309.

**Table S7** Summary statistics from mismatch distributions

| Mismatch statistics |      |          |                             |            |            |        |                              |          |       |        |
|---------------------|------|----------|-----------------------------|------------|------------|--------|------------------------------|----------|-------|--------|
| Sample              | Mean | Variance | Sudden population expansion |            |            |        | Spatial population expansion |          |       |        |
|                     |      |          | Tau                         | $\Theta_0$ | $\Theta_1$ | SSD    | Tau                          | $\Theta$ | M     | SSD    |
| 1                   | 5.60 | 11.77    | 7.58                        | 0.002      | 13.059     | 0.0055 | 4.858                        | 2.467    | 5.527 | 0.0070 |
| 2                   | 5.70 | 13.87    | 8.96                        | 0.00       | 11.042     | 0.0118 | 5.588                        | 3.891    | 2.607 | 0.0164 |
| 3                   | 5.34 | 13.35    | 7.69                        | 0.00       | 10.410     | 0.0346 | 5.602                        | 1.428    | 3.318 | 0.0211 |
| 4                   | 4.05 | 14.46    | 9.12                        | 0.00       | 4.012      | 0.0420 | 5.749                        | 1.427    | 1.146 | 0.0198 |
| 5                   | 3.44 | 11.41    | No convergence              |            |            |        | 5.853                        | 1.902    | 0.725 | 0.0231 |
| 6                   | 3.37 | 13.49    | 8.43                        | 0.00       | 1.807      | 0.0620 | 6.511                        | 0.748    | 0.826 | 0.0176 |
| 7                   | 3.09 | 13.05    | No convergence              |            |            |        | 5.810                        | 0.448    | 0.806 | 0.0332 |
| 8                   | 3.56 | 16.83    | No convergence              |            |            |        | 7.412                        | 0.704    | 0.729 | 0.0127 |
| 9                   | 3.15 | 14.22    | No convergence              |            |            |        | 7.010                        | 0.834    | 0.605 | 0.0164 |
| 10                  | 4.46 | 12.74    | No convergence              |            |            |        | 6.068                        | 0.914    | 1.982 | 0.0323 |
| 11                  | 4.20 | 17.83    | 8.27                        | 0.00       | 2.848      | 0.0772 | 6.861                        | 0.677    | 1.089 | 0.0284 |
| 12                  | 0.25 | 0.25     | 10.21                       | 0.00       | 0.287      | 0.0005 | 0.227                        | 0.106    | 3.441 | 0.0001 |
| 13                  | 0.12 | 0.11     | 3.00                        | 0.00       | 0.140      | 0.0002 | 0.084                        | 0.106    | 1.648 | 0.0001 |
| 14                  | 0.36 | 0.58     | 3.00                        | 0.00       | 0.285      | 0.0021 | 1.204                        | 0.114    | 0.305 | 0.0001 |
| 15                  | 0.34 | 0.26     | 3.00                        | 0.00       | 9999       | 0.0023 | 0.386                        | 0.006    | 99999 | 0.0213 |
| 16                  | 0.29 | 0.27     | 3.00                        | 0.00       | 0.375      | 0.0027 | 0.313                        | 0.001    | 99999 | 0.0002 |
| 17                  | 0.29 | 0.24     | 3.00                        | 0.00       | 0.390      | 0.0040 | 0.324                        | 0.001    | 99999 | 0.0007 |

Mean = mean number of mismatches; Variance = variance of mismatch mean; SSD = sum of squares of deviation between sudden population expansion model and observed mismatch distribution. Neither SSD nor the raggedness statistic showed significant deviations from the demographic or spatial expansion models. Dates and  $N_e$  were not estimated from the mismatch distributions because uncertainties in estimates of a mutation rate produce large uncertainties around the estimates.

The analysis of nucleotide mismatch distributions is often used to estimate historical population parameters when the distribution does not deviated from a unimodal distribution. Tests for a unimodal distribution are not powerful, so many apparently multimodal distributions do not reject the hypothesis of unimodality. Coalescence theory predicts that in an expanding population deep haplotype partitions can also occur that produce multimodal distributions. The crest of fitted model distribution, measured with  $\tau = 2ut$ , is taken to represent the time of a population expansion. However, estimates of the mutation rate  $u$  are difficult to make (see discussion in Ho *et al.* 2005). In any case, the shape of the mismatch distribution is influenced not only by recent mutations appearing during a population expansion, but also by ancestral polymorphisms in the expanding populations. This produces a bias in the estimate of the ‘time-since-expansion’ by pushing it into the past.

The following mismatch curves are included in this supplemental section, but were not used to estimate demographic parameters. The use of mismatch estimates to test demographic hypothesis represents an over-interpretation of sequence data in most cases. Hence, parameter estimates and the mismatch distributions for each of the samples ( $n$  ranged from 46 to 180) are presented, but without detailed analysis, for those who would like this information. However, in overall appearance, these mismatch distributions are consistent in supporting the hypothesis that western North Pacific populations have deep mtDNA partitions, expected for older populations, and



southeastern populations have very shallow mtDNA haplotype divergences, expected for recently established populations.

**Figure S1.** Mitochondrial DNA mismatch distributions (bars) of samples of red king crab from the Okhotsk Sea, Norton Sound and Adak Island area. The curves are the expected distributions for a spatial expansion. Distributions and models were estimated with ARLEQUIN.

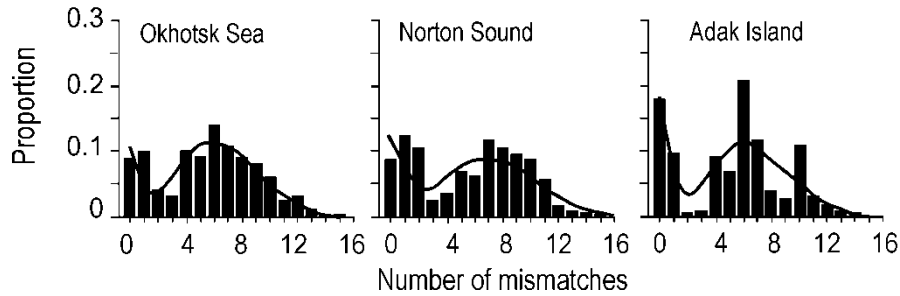

**Figure S2.** Mitochondrial DNA mismatch distributions in samples of red king crab from the Southeastern Bering Sea and western Gulf of Alaska. The curves are the expected distributions for a spatial expansion. Distributions and models were estimated with ARLEQUIN. Sample locations as in Table 1

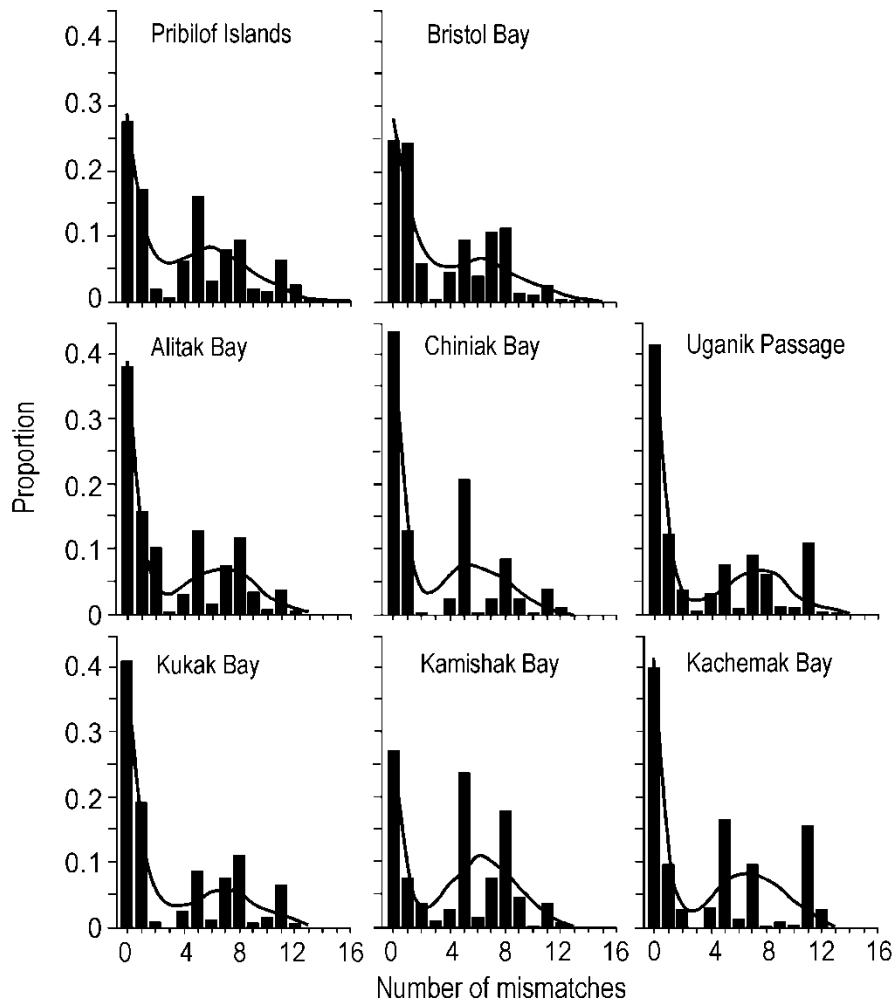

**Figure S3.** Mitochondrial DNA mismatch distributions of samples of red king crab from Southeast Alaska. Sample locations as in Table 1. The curves are the expected distributions for a spatial expansion. Distributions and models were estimated with ARLEQUIN.

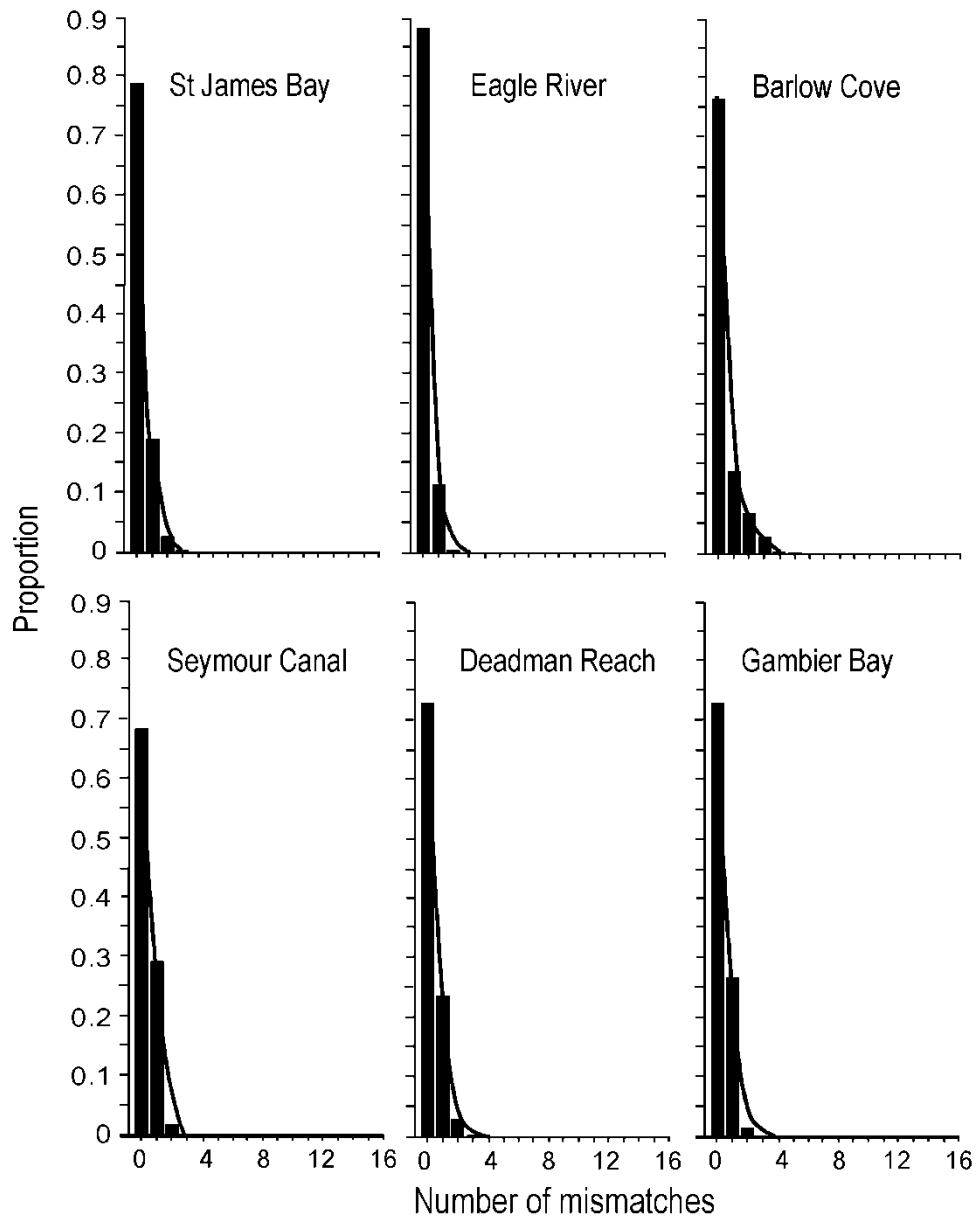

Supplement: eva0005-0820-SD1.pdf [file eva0005-0820-SD1.pdf]
